# Supplementary material
Source: publisher figshare collection journal article supplement (https://karger.figshare.com/ndownloader/files/13698641)
Supplement: Supplementary file 1 [file 13698641]

**Supplementary Figures Legends:**

**Figure S1:** Consort diagram for the study.

**Figure S2**: FES-I scores (mean and standard error) at baseline and 6-month follow-up.
